# Supplementary material
Source: MDPI journal article supplement (https://www.mdpi.com/1424-2818/14/12/1025)
Supplement: s1 [file s1]

Archive with 3 entries (3 files):
- Figure S1 and Table S3.pdf
- Table S1.pdf
- Table S2.pdf
