# Supplementary material
Source: MDPI journal article supplement (https://www.mdpi.com/1424-2818/14/12/1025)
Supplement: s1 [file s1]

**Table S1.** Invasiveness categories, according to the Invasive Species Compendium (CABI).

| Category            | Description                                                                                                                                                                                                                                                                                                                                                                                                                                                                                                                                                                                      |
|---------------------|--------------------------------------------------------------------------------------------------------------------------------------------------------------------------------------------------------------------------------------------------------------------------------------------------------------------------------------------------------------------------------------------------------------------------------------------------------------------------------------------------------------------------------------------------------------------------------------------------|
| Highly invasive     | <p>Invasive in its native range<br/> Proved invasive outside its native range<br/> Has a broad native range<br/> Abundant in its native range<br/> Highly adaptable to different environments<br/> Is a habitat generalist<br/> Tolerates, or benefits from, cultivation, browsing pressure, mutilation, fire etc.<br/> Pioneering in disturbed areas<br/> Benefits from human association (i.e. it is a human commensal)<br/> Long lived<br/> Fast growing<br/> Has high reproductive potential<br/> Has propagules that can remain viable for more than one year<br/> Reproduces asexually</p> |
| Moderately invasive | <p>Invasive in its native range<br/> Proved invasive outside its native range<br/> Tolerates, or benefits from, cultivation, browsing pressure, mutilation, fire etc.<br/> Highly mobile locally<br/> Has high reproductive potential<br/> Has propagules that can remain viable for more than one year</p>                                                                                                                                                                                                                                                                                      |
