# Supplementary material
Source: MDPI journal article supplement (https://www.mdpi.com/1424-2818/14/12/1025)
Supplement: s1 [file s1 › Figure S1 and Table S3.pdf]

**Figure S1.** Publication bias assessment for the three data sets.

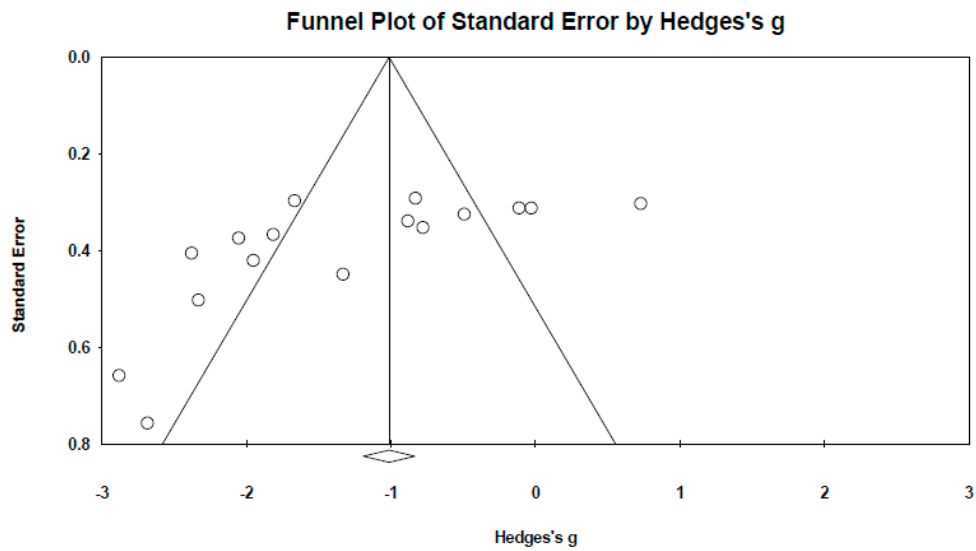

**Figure S1.1.** Funnel plot of the meta-analyses conducted for allelic richness (Ar) data

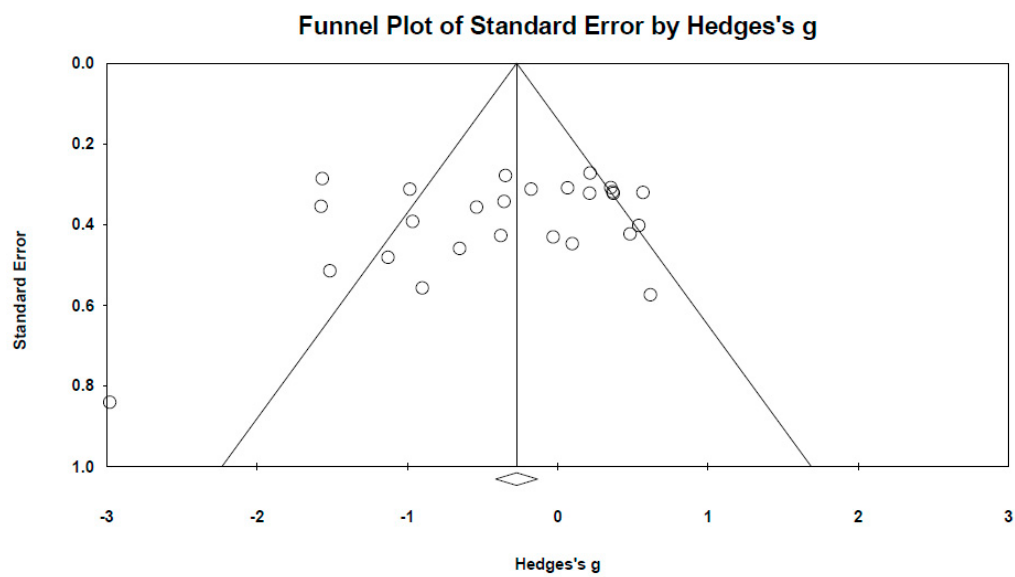

**Figure S1.2.** Funnel plot of the meta-analyses conducted for inbreeding coefficient ( $F_{IS}$ ) data.

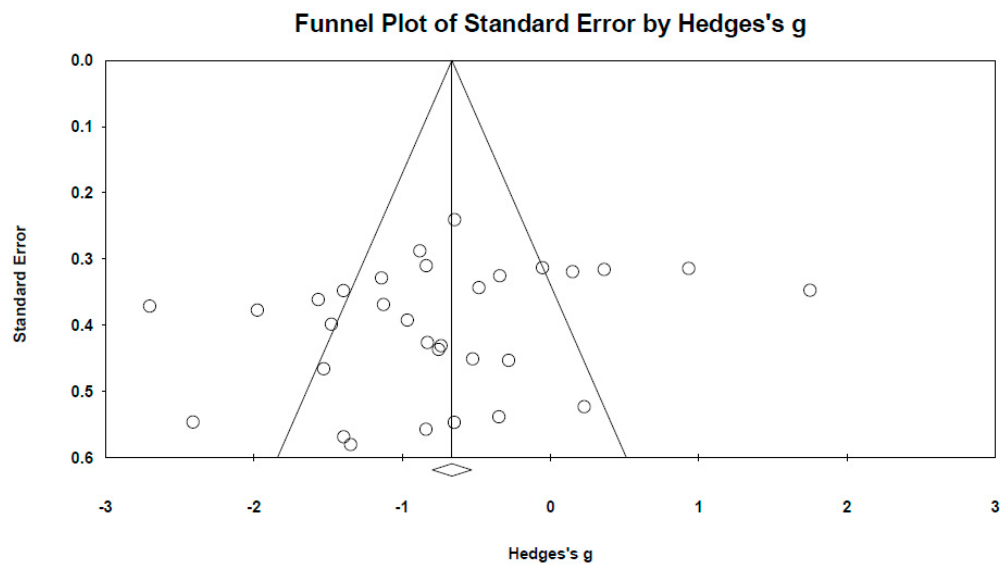

**Figure S1.3.** Funnel plot of the meta-analyses conducted for genetic diversity ( $H_E$ ) data.

**Table S3.1.** Observed and adjusted overall effect size values after Duval & Tweedie's trim and fill procedure on inbreeding ( $F_{IS}$ ) data.

| Effects on inbreeding coefficient ( $F_{IS}$ ) |                 |                 |             |             |
|------------------------------------------------|-----------------|-----------------|-------------|-------------|
|                                                | Studies trimmed | Effect estimate | Lower limit | Upper limit |
| Observed values                                |                 | -0.328          | -0.615      | -0.041      |
| Adjusted values                                | 1               | -0.276          | -0.572      | 0.019       |

**Table S3.2.** Observed and adjusted overall effect size values after Duval & Tweedie's trim and fill procedure on genetic diversity ( $H_E$ ) data.

| Effects on genetic diversity ( $H_E$ ) |                 |                 |             |             |
|----------------------------------------|-----------------|-----------------|-------------|-------------|
|                                        | Studies trimmed | Effect estimate | Lower limit | Upper limit |
| Observed values                        |                 | -0.663          | -0.747      | -0.531      |
| Adjusted values                        | 9               | -0.331          | -0.450      | -0.211      |
