# Supplementary material
Source: MDPI journal article supplement (https://www.mdpi.com/1424-2818/14/12/1025)
Supplement: s1 [file s1 › Table S2.pdf]

**Table S2.** Summary of the case studies used in the meta-analysis. Effect size (Edges'g), and its variance values are reported, as well as the upper and lower confidence intervals (CI) for each case, and its respective Z- and p-values. All case studies here were obtained from peer-reviewed papers. Data sets included in meta-analyses. He: Expected heterozygosity, Fis: Inbreeding coefficient.

| ID  | Ref. | Expected heterozygosity (He) |        |        |         |         |
|-----|------|------------------------------|--------|--------|---------|---------|
|     |      | Hedges'g                     | lowCI  | upCI   | Z-value | P-value |
| H01 | 1    | -0.523                       | -1.408 | 0.361  | -1.160  | 0.246   |
| H02 | 2    | -0.648                       | -1.720 | 0.425  | -1.184  | 0.237   |
| H03 | 3    | -0.828                       | -1.664 | 0.008  | -1.942  | 0.052   |
| H04 | 4    | -1.565                       | -2.273 | -0.856 | -4.328  | 0.000   |
| H05 | 4    | 1.752                        | 1.071  | 2.433  | 5.042   | 0.000   |
| H06 | 5    | -1.528                       | -2.442 | -0.614 | -3.278  | 0.001   |
| H07 | 6    | -1.346                       | -2.484 | -0.208 | -2.318  | 0.020   |
| H08 | 7    | -1.125                       | -1.848 | -0.401 | -3.048  | 0.002   |
| H09 | 8    | -0.964                       | -1.733 | -0.195 | -2.455  | 0.014   |
| H10 | 9    | -1.394                       | -2.076 | -0.712 | -4.007  | 0.000   |
| H11 | 10   | 0.364                        | -0.256 | 0.983  | 1.150   | 0.250   |
| H12 | 11   | -0.281                       | -1.170 | 0.608  | -0.620  | 0.535   |
| H13 | 12   | -0.753                       | -1.609 | 0.103  | -1.723  | 0.085   |
| H14 | 13   | -1.476                       | -2.258 | -0.965 | -3.702  | 0.000   |
| H15 | 14   | -0.880                       | -1.444 | -0.315 | -3.055  | 0.002   |
| H16 | 15   | -0.737                       | -1.582 | 0.109  | -1.708  | 0.088   |
| H17 | 16   | -0.341                       | -0.979 | 0.298  | -1.046  | 0.295   |
| H18 | 17   | -0.836                       | -1.444 | -0.228 | -2.695  | 0.007   |
| H19 | 18   | 0.151                        | -0.475 | 0.777  | 0.472   | 0.637   |
| H20 | 19   | -1.975                       | -2.715 | -1.236 | -5.233  | 0.000   |
| H21 | 20   | -2.409                       | -3.481 | -1.338 | -4.407  | 0.000   |
| H22 | 21   | -1.138                       | -1.783 | -0.493 | -3.460  | 0.001   |
| H23 | 22   | -1.393                       | -2.508 | -0.278 | -2.449  | 0.014   |
| H24 | 23   | 0.934                        | 0.318  | 1.550  | 2.970   | 0.003   |
| H25 | 24   | -0.838                       | -1.931 | 0.255  | -1.503  | 0.133   |
| H26 | 25   | -0.346                       | -1.402 | 0.710  | -0.643  | 0.520   |
| H27 | 26   | -2.701                       | -3.249 | -1.973 | -7.272  | 0.000   |
| H28 | 27   | 0.229                        | -0.797 | 1.255  | 0.437   | 0.662   |
| H29 | 28   | -0.053                       | -0.667 | 0.561  | -0.168  | 0.866   |
| H30 | 29   | -0.645                       | -1.117 | -0.173 | -2.679  | 0.007   |
| H31 | 30   | -0.481                       | -1.154 | 0.192  | -1400   | 0.161   |

| Inbreeding coefficient ( $F_{IS}$ ) |      |           |        |        |         |         |
|-------------------------------------|------|-----------|--------|--------|---------|---------|
| ID                                  | Ref. | Hedges' g | lowCI  | upCI   | Z-value | P-value |
| I01                                 | 1    | 0.098     | -0.779 | 0.976  | 0.22    | 0.826   |
| I02                                 | 2    | -0.899    | -1.992 | 0.193  | -1.613  | 0.107   |
| I03                                 | 3    | -0.029    | -0.874 | 0.816  | -0.067  | 0.947   |
| I04                                 | 4    | -0.176    | -0.788 | 0.437  | -0.562  | 0.574   |
| I05                                 | 4    | -0.983    | -1.595 | -0.37  | -3.144  | 0.002   |
| I06                                 | 5    | 0.541     | -0.248 | 1.33   | 1.343   | 0.179   |
| I07                                 | 7    | -0.539    | -1.238 | 0.161  | -1.508  | 0.132   |
| I08                                 | 8    | -0.964    | -1.733 | -0.195 | -2.455  | 0.014   |
| I09                                 | 9    | 0.067     | -0.539 | 0.673  | 0.217   | 0.828   |
| I10                                 | 10   | 0.217     | -0.317 | 0.751  | 0.796   | 0.426   |
| I11                                 | 11   | 0.569     | -0.06  | 1.198  | 1.774   | 0.076   |
| I12                                 | 12   | -0.651    | -1.552 | 0.25   | -1.417  | 0.156   |
| I13                                 | 13   | -0.377    | -1.215 | 0.461  | -0.882  | 0.378   |
| I14                                 | 14   | -0.346    | -0.892 | 0.200  | -1.242  | 0.214   |
| I15                                 | 15   | 0.214     | -0.419 | 0.846  | 0.663   | 0.508   |
| I16                                 | 16   | 0.372     | -0.261 | 1.005  | 1.151   | 0.250   |
| I17                                 | 18   | 0.355     | -0.25  | 0.959  | 1.149   | 0.250   |
| I18                                 | 19   | -1.128    | -2.701 | -0.184 | -2.342  | 0.019   |
| I19                                 | 20   | -1.515    | -2.524 | -0.505 | -2.941  | 0.003   |
| I20                                 | 21   | -1.573    | -2.269 | -0.877 | -4.429  | 0.000   |
| I21                                 | 22   | -2.979    | -4.628 | -1.331 | -3.542  | 0.000   |
| I22                                 | 24   | 0.618     | -0.508 | 1.744  | 1.076   | 0.282   |
| I23                                 | 25   | 0.483     | -0.347 | 1.313  | 1.140   | 0.254   |
| I24                                 | 28   | 0.368     | -0.257 | 0.993  | 1.153   | 0.249   |
| I25                                 | 29   | -1.565    | -2.126 | -1.004 | -5.465  | 0.000   |
| I26                                 | 30   | -0.356    | -1.028 | 0.317  | -1.036  | 0.300   |

## References

1. Durka et al. 2005. Molecular evidence for multiple introductions of garlic mustard (*Alliaria petiolata*, Brassicaceae) to North America. *Molecular Ecology* 14, 1697–1706.
2. Williams et al. 2005. Chloroplast and microsatellite DNA diversities reveal the introduction history of Brazilian peppertree (*Schinus terebinthifolius*) in Florida. *Molecular Ecology* 14, 3643–3656.
3. Ross et al. 2008. Genetic relationships among three native North-american *Mahonia* species, invasive *Mahonia* populations from Europe, and commercial cultivars. *Plant Syst Evol* 275, 219-229.
4. Alexander et al. 2009. Contrasting patterns of genetic variation and structure in plant invasions of mountains. *Diversity and Distributions* 15, 502-512.

5. Henry et al. 2009. Reduced genetic diversity, increased isolation and multiple introductions of invasive giant hogweed in the western Swiss Alps. *Molecular Ecology* 18, 2819-2831.
6. Lachmuth et al. 2010. The making of a rapid plant invader: genetic diversity and differentiation in the native and invaded range of *Senecio inaequalis*. *Molecular Ecology* 19, 3952-3967.
7. Pairon et al. 2010. Multiple introductions boosted genetic diversity in the invasive range of black cherry (*Prunus serotina*; Rosaceae). *Annals of Botany* 105, 881-890.
8. DeWalt et al. 2011. Geographic distribution of genetic variation among native and introduced populations of chinese tallow tree, *Triadica sebifera* (Euphorbiaceae). *American Journal of Botany* 98 (7), 1128-1138.
9. Niu et al. 2012. Inferring the invasion history of coral berry *Ardisia crenata* from China to the USA using molecular markers. *Ecol Res* 27, 809-818.
10. Kelager et al. 2013. Multiple introductions and no loss of genetic diversity: invasion history of Japanese Rose, *Rosa rugosa*, in Europe. *Biol Invasions* 15, 1125-1141.
11. Molins et al. 2014. Biogeographic variation in genetic variability, apomixis expression and ploidy of St. John's wort (*Hypericum perforatum*) across its native and introduced range. *Annals of Botany* 113, 417-427.
12. Williams & Fishman. 2014. Genetic evidence for founder effects in the introduced range of houndstongue (*Cynoglossum officinale*). *Biol Invasions* 16, 205-216.
13. Ferrero et al. 2015. Invasion genetics of the Bermuda buttercup (*Oxalis pes-caprae*): complex intercontinental patterns of genetic diversity, polyploidy and heterostyly characterize both native and introduced populations. *Molecular Ecology* 24, 2143-2155.
14. Kang et al. 2007. Testing the role of genetic factors across multiple independent invasions of the shrub Scotch broom (*Cytisus scoparius*). *Molecular Ecology* 16, 4662-4673.
15. Prentis et al. 2009. Understanding invasion history: genetic structure and diversity of two globally invasive plants and implications for their management. *Diversity and Distributions* 15, 822-830.
16. Gaudeul et al. 2011. Nuclear and chloroplast microsatellites show multiple introductions in the worldwide invasion history of common ragweed, *Ambrosia artemisiifolia*. *Plos One* 6 (3), e17658.
17. Hornoy et al. 2013. Two colonization stages generate two different patterns of genetic diversity within native and invasive ranges of *Ulex europaeus*. *Heredity* 111, 355-363.
18. Mandak et al. 2013. European Invasion of North American *Pinus strobus* at Large and Fine Scales:

High Genetic Diversity and Fine-Scale Genetic Clustering over Time in the Adventive Range. Plos one 8 (7), e68514.

29. Zhao et al. 2013. Population Structure and Genetic Diversity of Native and Invasive Populations of *Solanum rostratum* (Solanaceae). Plos one 8 (11), e79807.

20. Rijal et al. 2015. Reconstructing the invasion history of *Heracleum persicum* (Apiaceae) into Europe. Molecular Ecology 24, 5522-5543.

21. Xu et al. 2015. Population structure and genetic diversity of invasive *Phyla canescens*: implications for the evolutionary potential. Ecosphere 6 (9), 162.

22. Mukherjee et al. 2016. Microsatellite and chloroplast DNA diversity of the invasive aquatic weed *Hygrophila polysperma* in native and invasive ranges. Aquatic Botany 129, 55-61.

23. Rosche et al. 2016. The population genetics of the fundamental cytotype-shift in invasive *Centaurea stoebe* s.l.: genetic diversity, genetic differentiation, and small-scale genetic structure differ between cytotypes but not between ranges. Biol Invasions 18, 1895-1910.

24. Thompson et al. 2016. Genetic diversity and structure of the globally invasive tree, *Paraserianthes lophantha* subspecies *lophantha*, suggest an introduction history characterized by varying propagule pressure. Tree Genetics & Genomes 12, 27.

25. Zavada et al. 2017. Population structure in chicory (*Cichorium intybus*): A successful U.S. weed since the American revolutionary war. Ecology and Evolution 7, 4209-4219.

26. Zhu et al. 2017. Invasion genetics of *Senecio vulgaris*: loss of genetic diversity characterizes the invasion of a selfing annual, despite multiple introductions. Biol Invasions 19, 255-267.

27. Hernandez et al. 2019. Genetic diversity and population structure of wild sunflower (*Helianthus annuus* L.) in Argentina: Reconstructing its invasion history. Journal of heredity 746-759.

28. Rosche et al. 2019. Climate outweighs native vs. nonnative range-effects for genetics and common garden performance of a cosmopolitan weed. Ecological Monographs 89 (4), e01386.

29. Xia et al. 2020. Rapid genetic divergence of an invasive species, *Spartina alterniflora*, in China. Front. Genet. 11, 284.

30. Hirsch et al. 2021. Genetic analyses reveal complex introduction histories for the invasive tree *Acacia dealbata* Link around the world. Diversity and Distributions 27, 360-376.
